# Supplementary material
Source: PubMed Central journal article supplement (PMC3703870)
Supplement: NIHMS481627-supplement-1.pdf [file NIHMS481627-supplement-1.pdf]

## Supplementary Material

### CD33 Alzheimer's disease locus: Altered monocyte function and amyloid biology

Bradshaw EM<sup>1,2,3</sup>, Chibnik LB<sup>1,2,3,4</sup>, Keenan BT<sup>1,2,4</sup>, Ottoboni L<sup>1,2,4</sup>, Raj, T<sup>1,2,3,4</sup>, Tang A<sup>1,2,4</sup>, Rosenkrantz LL<sup>1,2,4</sup>, Imboywa S<sup>1,2,4</sup>, Lee M<sup>1,2</sup>, Von Korff A<sup>1,2</sup>, The Alzheimer's Disease Neuroimaging Initiative<sup>7</sup>, Morris MC<sup>5</sup>, Evans DA<sup>6</sup>, Johnson K<sup>3,9,10</sup>, Sperling RA<sup>3,7,9,10</sup>, Schneider JA<sup>5</sup>, Bennett DA<sup>5</sup>, De Jager PL<sup>1,2,3,4</sup>.

<sup>1</sup>Center for Neurologic Diseases, Brigham and Women's Hospital, Harvard Medical School, Boston, Massachusetts 02115, USA.

<sup>2</sup>Program in Translational NeuroPsychiatric Genomics, Institute for the Neurosciences, Departments of Neurology and Psychiatry, Brigham and Women's Hospital, 77 Avenue Louis Pasteur, NRB168, Boston, MA 02115

<sup>3</sup>Harvard Medical School, Boston, MA 02115

<sup>4</sup>Program in Medical and Population Genetics, Broad Institute, 7 Cambridge Center, Cambridge, MA 02142

<sup>5</sup>Rush Alzheimer's Disease Center, Rush University Medical Center, 600 S Paulina St., Chicago, IL 60612

<sup>6</sup>Rush Institute for Healthy Aging, Rush University Medical Center, 1645 W. Jackson Blvd., Chicago 60612

<sup>7</sup>Data used in preparation of this article were obtained from the Alzheimer's Disease Neuroimaging Initiative (ADNI) database ([adni.loni.ucla.edu](http://adni.loni.ucla.edu)). As such, the investigators within the ADNI contributed to the design and implementation of ADNI and/or provided data but did not participate in analysis or writing of this report. A complete listing of ADNI investigators can be found at:

[http://adni.loni.ucla.edu/wpcontent/uploads/how\\_to\\_apply/ADNI\\_Authorship\\_List.pdf](http://adni.loni.ucla.edu/wpcontent/uploads/how_to_apply/ADNI_Authorship_List.pdf).

<sup>8</sup>Department of Neurology, Center for Alzheimer's Research and Treatment, Brigham and Women's Hospital, 221 Longwood Avenue, Boston, MA 02115, USA

<sup>9</sup>Department of Neurology, Massachusetts General Hospital, Boston, MA, USA

<sup>10</sup>The Athinoula A. Martinos Center for Biomedical Imaging, Massachusetts General Hospital, Boston, MA, USA

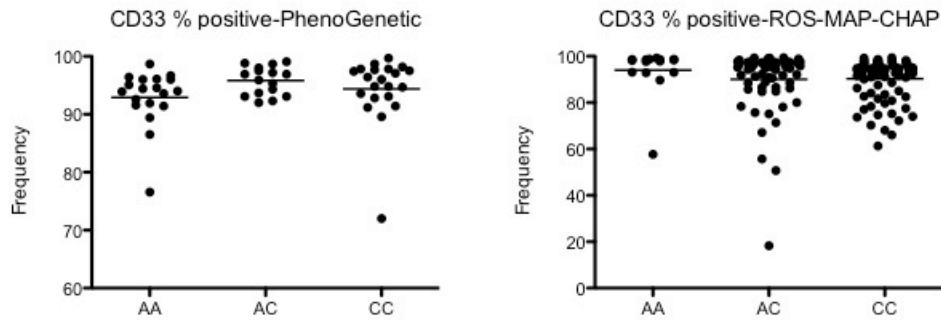

**Supplemental Figure 1: There is no difference in the frequency of CD33 positive monocytes from subjects separated by genotype.** The frequency of CD33 positive cells was determined for the PhenoGenetic cohort (a) and the ROS-MAP-CHAP cohorts (b) used for determining CD33 MFI. No significant difference was seen between rs3865444 genotypes ( $p = 0.21$  and  $0.43$  respectively). Each circle represents an individual. The line represents the mean.

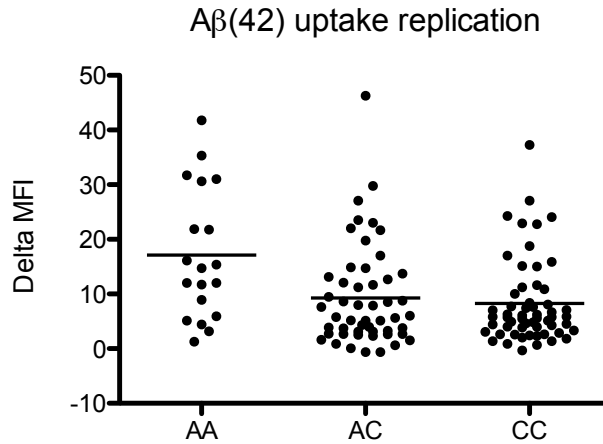

**Supplemental Figure 2: Replication of the *CD33* risk allele being associated with decreased A-beta uptake by monocytes.** The delta MFI of FITC-labeled A $\beta$ (42) uptake by monocytes from healthy adults was measured and compared between subjects of different genotypes (N=128). All subjects were different from the subjects reported in Figure 2. 33 of these subjects are from the PhenoGenetic collection, and 94 come from the Harvard Aging Brain study. A dominant model was used in the analysis, adjusting for age and sex. Each circle represents an individual.

| <b>Supplemental Table 1a. Demographic characteristics<sup>†</sup> of the BWH PhenoGenetic project subjects used in different experiments</b> |                              |                             |                     |                            |                                            |
|----------------------------------------------------------------------------------------------------------------------------------------------|------------------------------|-----------------------------|---------------------|----------------------------|--------------------------------------------|
|                                                                                                                                              | <b>PhenoGenetic subjects</b> |                             |                     |                            |                                            |
|                                                                                                                                              | <b>CD33<br/>Discovery</b>    | <b>CD33<br/>Replication</b> | <b>Dextran</b>      | <b>A<math>\beta</math></b> | <b>A<math>\beta</math><br/>Replication</b> |
| <b>sample size</b>                                                                                                                           | 32                           | 19                          | 30                  | 32                         | 128                                        |
| <b>age at<br/>sampling</b>                                                                                                                   | 26.5<br>[20.0-50.0]          | 34.0<br>[20.0-54.0]         | 30.5<br>[20.0-54.0] | 27.0<br>[20.0-53.0]        | 68.75<br>[20.0-86.50]                      |
| <b>female</b>                                                                                                                                | 20 (67%)                     | 5 (26%)                     | 14 (47%)            | 25 (78%)                   | 70 (55%)                                   |

<sup>†</sup>Summary Statistics presented as median [min - max] or count (%)

| <b>Supplemental Table 1b. Demographic characteristics of the ROS, MAP and CHAP subjects for the CD33</b> |            |            |             |
|----------------------------------------------------------------------------------------------------------|------------|------------|-------------|
|                                                                                                          | <b>ROS</b> | <b>MAP</b> | <b>CHAP</b> |
| <b>sample size</b>                                                                                       | 91         | 60         | 24          |
| <b>age at sampling</b>                                                                                   | 78.3 (5.8) | 84.0 (5.0) | 78.6 (8.7)  |
| <b>female</b>                                                                                            | 48 (53%)   | 34 (57%)   | 15 (63%)    |
| <b>AD (pathological<br/>diagnosis)</b>                                                                   | 56 (62%)   | 40 (67%)   | 0 (0%)      |

| <b>Supplemental Table 2. Analysis for the rs3865444<sup>C</sup> risk allele in monocyte functional assays</b> |                       |                       |                          |                    |                       |                           |                                |                       |                           |
|---------------------------------------------------------------------------------------------------------------|-----------------------|-----------------------|--------------------------|--------------------|-----------------------|---------------------------|--------------------------------|-----------------------|---------------------------|
|                                                                                                               | <b>Dextran uptake</b> |                       |                          | <b>Aβ42 uptake</b> |                       |                           | <b>Aβ42 uptake replication</b> |                       |                           |
|                                                                                                               | <b>n</b>              | <b>Median (Q1-Q3)</b> | <b>p-value*</b>          | <b>n</b>           | <b>median (Q1-Q3)</b> | <b>p-value*</b>           | <b>n</b>                       | <b>median (Q1-Q3)</b> | <b>p-value*</b>           |
| <b>rs3865444, additive</b>                                                                                    |                       |                       |                          |                    |                       |                           |                                |                       |                           |
| AA                                                                                                            | 10                    | 13.7<br>(8.0 - 19.6)  | t(29) =<br>2.66<br>0.01  | 9                  | 28.2<br>(18.4 - 43.4) | t(31) =<br>-3.27<br>0.003 | 19                             | 16.1<br>(5.9-35.4)    | t(124) =<br>-1.74<br>0.08 |
| AC                                                                                                            | 9                     | 3.3<br>(-0.8 - 9.2)   |                          | 12                 | 13.9<br>(9.3 - 18.3)  |                           | 52                             | 5.7<br>(2.9-14.3)     |                           |
| CC                                                                                                            | 11                    | 3.5<br>(0.7 - 6.6)    |                          | 11                 | 11.8<br>(8.6 - 17.0)  |                           | 57                             | 5.8<br>(3.3-10.0)     |                           |
| <b>rs3865444, dominant</b>                                                                                    |                       |                       |                          |                    |                       |                           |                                |                       |                           |
| AA                                                                                                            | 10                    | 13.7<br>(8.0 - 19.6)  | t(29) =<br>3.33<br>0.003 | 9                  | 28.2<br>(18.4 - 43.4) | t(31) =<br>3.64<br>0.001  | 19                             | 16.1<br>(5.9-35.4)    | t(124) =<br>2.18,<br>0.03 |
| AC/CC                                                                                                         | 20                    | 5.3<br>(0.7 - 7.9)    |                          | 23                 | 12.7<br>(8.9 - 17.2)  |                           | 10<br>9                        | 5.7<br>(3.1-12.7)     |                           |

\* p-value from ANOVA with dextran uptake values or square root transformed Aβ42 uptake values, controlling for age and batch (for Aβ42 uptake)

| <b>Supplemental Table 3a. Demographic characteristics† of the Harvard Aging Brain study and ADNI subjects used in PiB imaging experiments</b> |                             |                  |
|-----------------------------------------------------------------------------------------------------------------------------------------------|-----------------------------|------------------|
|                                                                                                                                               | <b>PiB imaging subjects</b> |                  |
|                                                                                                                                               | <b>HAB</b>                  | <b>ADNI</b>      |
| <b>sample size</b>                                                                                                                            | 122                         | 96               |
| <b>age at sampling</b>                                                                                                                        | 72.1 [65.0-86.5]            | 75.7 [55.2-89.9] |
| <b>female</b>                                                                                                                                 | 69 (57%)                    | 33 (34%)         |
| <b>MCI</b>                                                                                                                                    | 0 (0%)                      | 60 (63%)         |
| <b>AD</b>                                                                                                                                     | 0 (0%)                      | 19 (20%)         |

†Summary Statistics presented as median [min - max] or count (%)

| <b>Supplemental Table 3b. Analysis for the rs3865444<sup>C</sup> risk allele and PiB</b> |                                             |                                             |
|------------------------------------------------------------------------------------------|---------------------------------------------|---------------------------------------------|
|                                                                                          | <b>β estimate (SE) [p-value]</b>            |                                             |
|                                                                                          | <b>Total</b>                                | <b>Asymptomatic</b>                         |
| <b>sample size</b>                                                                       | 218                                         | 139                                         |
| <b>rs3865444, additive for C</b>                                                         |                                             |                                             |
| PiB positive vs negative                                                                 | 0.39 (0.24) [ $\chi^2(1)=2.78$ , $p=0.10$ ] | 0.46 (0.31) $\chi^2(1)=2.23$ , [ $p=0.14$ ] |
| continuous PiB                                                                           | 0.09 (0.04) [ $Z=1.22$ , $p=0.22$ ]         | 0.05 (0.03) [ $Z=1.32$ , $p=0.19$ ]         |
| <b>rs3865444, dominant for C</b>                                                         |                                             |                                             |
| PiB positive vs negative                                                                 | 1.85 (0.79) [ $\chi^2(1)=5.52$ , $p=0.02$ ] | 1.82 (1.07) $\chi^2(1)=2.87$ , [ $p=0.09$ ] |
| continuous PiB                                                                           | 0.19 (0.08) [ $Z=2.35$ , $p=0.02$ ]         | 0.12 (0.08) [ $Z=1.48$ , $p=0.14$ ]         |

| <b>Supplemental Table 4: Association between rs3865444<sup>C</sup> and Neuropathological phenotypes (n=151)</b> |                                               |                            |                            |
|-----------------------------------------------------------------------------------------------------------------|-----------------------------------------------|----------------------------|----------------------------|
| <b>Phenotype</b>                                                                                                | <b>Association with rs3865444<sup>C</sup></b> | <b>p-value<sup>1</sup></b> | <b>p-value<sup>2</sup></b> |
| Neuritic amyloid plaques <sup>3</sup>                                                                           | Yes                                           | Z=2.47, p=0.01             | Z=1.74, p=0.08             |
| Pathologic diagnosis of AD <sup>4</sup>                                                                         | Yes                                           | $\chi^2(1)=6.53$ , p=0.01  | $\chi^2(1)=3.99$ , p=0.05  |
| Neurofibrillary tangles <sup>3</sup>                                                                            | No                                            | Z=1.40, p=0.16             | Z=0.13, p=0.90             |

<sup>1</sup> adjusted for age at death and sex

<sup>2</sup> adjusted for age at death, sex and cd33 surface expression

<sup>3</sup> ANOVA with square-root transformed values

<sup>4</sup> Logistic regression

| <b>Supplemental Table 5a. Demographic characteristics of the MAP subjects for the macrophage/microglia analyses</b> |                   |
|---------------------------------------------------------------------------------------------------------------------|-------------------|
| sample size                                                                                                         | 172               |
| age at sampling                                                                                                     | 89.8 [74.8-101.6] |
| age at death                                                                                                        | 89.8 [74.8-101.6] |
| education                                                                                                           | 15.0 [8.0-22.0]   |
| female                                                                                                              | 112 (65%)         |
| CHAP                                                                                                                | 0 (0%)            |
| ROS                                                                                                                 | 0 (0%)            |
| MAP                                                                                                                 | 172 (100%)        |
| AD                                                                                                                  | 60 (35%)          |
| MCI                                                                                                                 | 47 (27%)          |
| <b>NIA - Reagan criteria</b>                                                                                        |                   |
| <b>No-AD</b>                                                                                                        | 29 (17%)          |
| <b>Low</b>                                                                                                          | 74 (43%)          |
| <b>Intermediate</b>                                                                                                 | 67 (39%)          |
| <b>High</b>                                                                                                         | 2 (1%)            |

| <b>Supplemental Table 5b. Analysis for the rs3865444<sup>C</sup> risk allele in activated microglia/macrophage infiltrate</b> |          |                      |                  |                       |                 |
|-------------------------------------------------------------------------------------------------------------------------------|----------|----------------------|------------------|-----------------------|-----------------|
| <b>Variable (Region) †</b>                                                                                                    | <b>n</b> | <b>additive</b>      |                  | <b>dominant for C</b> |                 |
|                                                                                                                               |          | <b>Beta (95% CI)</b> | <b>p-value*‡</b> | <b>Beta</b>           | <b>p-value*</b> |
| Inferior Temporal Lobe                                                                                                        | 168      | 0.336 (0.110,0.551)  | Z=3.06<br>0.003  | 0.570                 | Z=2.11<br>0.036 |
| Mid-Frontal                                                                                                                   | 172      | 0.156 (-0.091,0.405) | Z=1.24<br>0.216  | 0.505                 | Z=1.65<br>0.102 |
| Posterior Putamen                                                                                                             | 166      | 0.253 (0.047,0.458)  | Z=2.42<br>0.017  | 0.281                 | Z=1.06<br>0.290 |
| Ventral Medial Caudate                                                                                                        | 160      | 0.058 (-0.142,0.255) | Z=0.58<br>0.563  | 0.382                 | Z=1.56<br>0.121 |

\* p-value for additive from GLM, p-value for dominant from Wilcoxon rank sum

†Outcome for each region was square-root transformed for normality

‡Models adjusted for age at death
